# Supplementary material for: Phase Ib Study of Combination Therapy with MEK Inhibitor Binimetinib and Phosphatidylinositol 3‐Kinase Inhibitor Buparlisib in Patients with Advanced Solid Tumors with RAS/RAF Alterations
Source: PubMed Central journal article supplement — Oncologist. 2019 Aug 8;25(1):e160–9. doi: 10.1634/theoncologist.2019-0297 (PMC6964137; doi:10.1634/theoncologist.2019-0297), 2019-08-08
Supplement: ONCO-25-e160-s001.pdf [file ONCO-25-e160-s001.pdf]

Supplemental Table for:  
Phase Ib Study of Combination Therapy with MEK Inhibitor Binimetinib and PI3K Inhibitor Buparlisib in Patients with Advanced Solid Tumors with RAS/RAF Alterations  
Mrinal Gounder et al.

**Table S1.** Analysis set by treatment group

|                              | BKM 50 mg +<br>MEK 30 mg | BKM 50 mg +<br>MEK 45 mg | BKM 60 mg +<br>MEK 45 mg | BKM 70 mg +<br>MEK 30 mg | BKM 80 mg +<br>MEK 30 mg | BKM 80 mg +<br>MEK 45 mg | BKM 90 mg +<br>MEK 45 mg | All Patients<br>N = 89 |
|------------------------------|--------------------------|--------------------------|--------------------------|--------------------------|--------------------------|--------------------------|--------------------------|------------------------|
| <b>Analysis set</b>          |                          |                          |                          |                          |                          |                          |                          |                        |
| Full analysis set            | 11                       | 5                        | 5                        | 6                        | 6                        | 50                       | 6                        | 89                     |
| Safety set                   | 11                       | 5                        | 5                        | 6                        | 6                        | 49                       | 7                        | 89                     |
| Dose-determining set         | 8                        | 4                        | 4                        | 3                        | 6                        | 33                       | 6                        | 64                     |
| Pharmacokinetic analysis set | 11                       | 5                        | 5                        | 6                        | 6                        | 48                       | 6                        | 87                     |

Abbreviations: BKM, buparlisib; MEK, mitogen-activated protein kinase.

**Table S2.** Dose levels at which dose-limiting toxicities occurred

| Dose of Combination Regimen            | Dose-Limiting Toxicity                                                                                                                   |
|----------------------------------------|------------------------------------------------------------------------------------------------------------------------------------------|
| <b>Dose-escalation phase</b>           |                                                                                                                                          |
| Buparlisib (50 mg)/binimetinib (30 mg) | Grade 1 central serous retinopathy<br>Grade 1 central serous retinopathy<br>Grade 2 glossitis                                            |
| Buparlisib (70 mg)/binimetinib (30 mg) | Grade 4 blood CPK elevation                                                                                                              |
| Buparlisib (80 mg)/binimetinib (30 mg) | Grade 3 stomatitis                                                                                                                       |
| Buparlisib (80 mg)/binimetinib (45 mg) | Grade 3 maculopapular rash                                                                                                               |
| Buparlisib (90 mg)/binimetinib (45 mg) | Grade 3 diarrhea<br>Grade 3 anaphylactic reaction and grade 3 face swelling                                                              |
| <b>Dose-expansion phase</b>            |                                                                                                                                          |
| Buparlisib (80 mg)/binimetinib (45 mg) | Grade 2 diarrhea<br>Grade 2 diarrhea<br>Grade 3 lipase elevation and grade 3 amylase elevation<br>Grade 3 diarrhea<br>Grade 3 stomatitis |

Abbreviation: CPK, creatine phosphokinase.

**Table S3.** Adverse events, regardless of study drug relationship, reported by ≥10% of patients (all grades) (safety set)

| Preferred Term       | Buparlisib/Binimetinib Dose, mg qd/bid (n) |               |               |               |               |               |               |               |               |               |                |               |               |               |                  |               |
|----------------------|--------------------------------------------|---------------|---------------|---------------|---------------|---------------|---------------|---------------|---------------|---------------|----------------|---------------|---------------|---------------|------------------|---------------|
|                      | 50/30 (n = 11)                             |               | 50/45 (n = 5) |               | 60/45 (n = 5) |               | 70/30 (n = 6) |               | 80/30 (n = 6) |               | 80/45 (n = 49) |               | 90/45 (n = 7) |               | All Pts (N = 89) |               |
|                      | All<br>n (%)                               | G3/4<br>n (%) | All<br>n (%)  | G3/4<br>n (%) | All<br>n (%)  | G3/4<br>n (%) | All<br>n (%)  | G3/4<br>n (%) | All<br>n (%)  | G3/4<br>n (%) | All<br>n (%)   | G3/4<br>n (%) | All<br>n (%)  | G3/4<br>n (%) | All<br>n (%)     | G3/4<br>n (%) |
| Total                | 11 (100)                                   | 11 (100)      | 5 (100)       | 5 (100)       | 5 (100)       | 5 (100)       | 6 (100)       | 6 (100)       | 6 (100)       | 6 (100)       | 49 (100)       | 43 (87.8)     | 7 (100)       | 7 (100)       | 89 (100)         | 83 (93.3)     |
| Diarrhea             | 6 (54.5)                                   | 0             | 3 (60.0)      | 1 (20.0)      | 3 (60.0)      | 1 (20.0)      | 3 (50.0)      | 0             | 4 (66.7)      | 0             | 33 (67.3)      | 7 (14.3)      | 7 (100)       | 1 (14.3)      | 59 (66.3)        | 10 (11.2)     |
| Blood CPK increased  | 5 (45.5)                                   | 2 (18.2)      | 4 (80.0)      | 2 (40.0)      | 3 (60.0)      | 2 (40.0)      | 3 (50.0)      | 2 (33.3)      | 3 (50.0)      | 0             | 33 (67.3)      | 15 (30.6)     | 3 (42.9)      | 2 (28.6)      | 54 (60.7)        | 25 (28.1)     |
| AST increase         | 3 (27.3)                                   | 0             | 3 (60.0)      | 0             | 4 (80.0)      | 1 (20.0)      | 3 (50.0)      | 1 (16.7)      | 2 (33.3)      | 1 (16.7)      | 28 (57.1)      | 9 (18.4)      | 4 (57.1)      | 1 (14.3)      | 47 (52.8)        | 13 (14.6)     |
| Nausea               | 3 (27.3)                                   | 0             | 2 (40.0)      | 0             | 3 (60.0)      | 0             | 3 (50.0)      | 0             | 3 (50.0)      | 0             | 28 (57.1)      | 1 (2.0)       | 4 (57.1)      | 1 (14.3)      | 46 (51.7)        | 2 (2.2)       |
| Fatigue              | 4 (36.4)                                   | 0             | 1 (20.0)      | 0             | 2 (40.0)      | 0             | 3 (50.0)      | 0             | 3 (50.0)      | 0             | 24 (49.0)      | 3 (6.1)       | 2 (28.6)      | 0             | 39 (43.8)        | 3 (3.4)       |
| ALT increase         | 2 (18.2)                                   | 0             | 1 (20.0)      | 0             | 2 (40.0)      | 1 (20.0)      | 2 (33.3)      | 0             | 1 (16.7)      | 1 (16.7)      | 23 (46.9)      | 11 (22.4)     | 4 (57.1)      | 1 (14.3)      | 35 (39.3)        | 14 (15.7)     |
| Stomatitis           | 2 (18.2)                                   | 1 (9.1)       | 2 (40.0)      | 1 (20.0)      | 1 (20.0)      | 0             | 3 (50.0)      | 0             | 4 (66.7)      | 1 (16.7)      | 20 (40.8)      | 3 (6.1)       | 2 (28.6)      | 0             | 34 (38.2)        | 6 (6.7)       |
| Decreased appetite   | 5 (45.5)                                   | 0             | 1 (20.0)      | 0             | 3 (60.0)      | 0             | 3 (50.0)      | 0             | 3 (50.0)      | 0             | 15 (30.6)      | 0             | 2 (28.6)      | 0             | 32 (36.0)        | 0             |
| Vomiting             | 4 (36.4)                                   | 1 (9.1)       | 1 (20.0)      | 0             | 1 (20.0)      | 0             | 2 (33.3)      | 0             | 4 (66.7)      | 0             | 18 (36.7)      | 0             | 2 (28.6)      | 2 (28.6)      | 32 (36.0)        | 3 (3.4)       |
| Peripheral edema     | 4 (36.4)                                   | 0             | 3 (60.0)      | 0             | 2 (40.0)      | 0             | 1 (16.7)      | 0             | 2 (33.3)      | 0             | 15 (30.6)      | 0             | 3 (42.9)      | 0             | 30 (33.7)        | 0             |
| Maculopapular rash   | 1 (9.1)                                    | 0             | 1 (20.0)      | 1 (20.0)      | 2 (40.0)      | 1 (20.0)      | 2 (33.3)      | 1 (16.7)      | 4 (66.7)      | 2 (33.3)      | 17 (34.7)      | 4 (8.2)       | 3 (42.9)      | 2 (28.6)      | 30 (33.7)        | 11 (12.4)     |
| Rash                 | 4 (36.4)                                   | 0             | 3 (60.0)      | 0             | 1 (20.0)      | 1 (20.0)      | 1 (16.7)      | 0             | 4 (66.7)      | 0             | 14 (28.6)      | 3 (6.1)       | 1 (14.3)      | 0             | 28 (31.5)        | 4 (4.5)       |
| Dermatitis acneiform | 1 (9.1)                                    | 1 (9.1)       | 2 (40.0)      | 1 (20.0)      | 3 (60.0)      | 0             | 2 (33.3)      | 1 (16.7)      | 1 (16.7)      | 0             | 15 (30.6)      | 1 (2.0)       | 2 (28.6)      | 0             | 26 (29.2)        | 4 (4.5)       |
| Hypokalemia          | 2 (18.2)                                   | 1 (9.1)       | 1 (20.0)      | 0             | 1 (20.0)      | 0             | 3 (50.0)      | 1 (16.7)      | 2 (33.3)      | 0             | 12 (24.5)      | 4 (8.2)       | 4 (57.1)      | 1 (14.3)      | 25 (28.1)        | 7 (7.9)       |
| Anemia               | 2 (18.2)                                   | 1 (9.1)       | 1 (20.0)      | 0             | 0             | 0             | 0             | 0             | 4 (66.7)      | 1 (16.7)      | 14 (28.6)      | 2 (4.1)       | 2 (28.6)      | 0             | 23 (25.8)        | 4 (4.5)       |
| Constipation         | 4 (36.4)                                   | 0             | 0             | 0             | 1 (20.0)      | 1 (20.0)      | 1 (16.7)      | 0             | 2 (33.3)      | 0             | 11 (22.4)      | 0             | 3 (42.9)      | 0             | 22 (24.7)        | 1 (1.1)       |
| Hyperglycemia        | 3 (27.3)                                   | 0             | 1 (20.0)      | 0             | 2 (40.0)      | 0             | 0             | 0             | 1 (16.7)      | 0             | 12 (24.5)      | 1 (2.0)       | 2 (28.6)      | 0             | 21 (23.6)        | 1 (1.1)       |
| Pyrexia              | 4 (36.4)                                   | 0             | 0             | 0             | 1 (20.0)      | 0             | 0             | 0             | 3 (50.0)      | 0             | 9 (18.4)       | 0             | 3 (42.9)      | 0             | 20 (22.5)        | 0             |
| Hypertension         | 1 (9.1)                                    | 1 (9.1)       | 1 (20.0)      | 1 (20.0)      | 1 (20.0)      | 0             | 0             | 0             | 2 (33.3)      | 0             | 12 (24.5)      | 3 (6.1)       | 2 (28.6)      | 2 (28.6)      | 19 (21.3)        | 7 (7.9)       |
| Dyspnea              | 3 (27.3)                                   | 1 (9.1)       | 2 (40.0)      | 1 (20.0)      | 1 (20.0)      | 0             | 0             | 0             | 1 (16.7)      | 0             | 11 (22.4)      | 1 (2.0)       | 0             | 0             | 18 (20.2)        | 3 (3.4)       |
| Amylase increased    | 1 (9.1)                                    | 0             | 1 (20.0)      | 1 (20.0)      | 0             | 0             | 2 (33.3)      | 0             | 1 (16.7)      | 1 (16.7)      | 11 (22.4)      | 2 (4.1)       | 1 (14.3)      | 0             | 17 (19.1)        | 4 (4.5)       |
| Lipase increased     | 2 (18.2)                                   | 1 (9.1)       | 0             | 0             | 1 (20.0)      | 0             | 1 (16.7)      | 0             | 1 (16.7)      | 1 (16.7)      | 11 (22.4)      | 7 (14.3)      | 1 (14.3)      | 0             | 17 (19.1)        | 9 (10.1)      |

|                                      |          |         |          |          |          |          |          |          |          |          |           |          |          |          |           |         |
|--------------------------------------|----------|---------|----------|----------|----------|----------|----------|----------|----------|----------|-----------|----------|----------|----------|-----------|---------|
| Pruritus                             | 3 (27.3) | 0       | 1 (20.0) | 0        | 1 (20.0) | 0        | 1 (16.7) | 0        | 1 (16.7) | 0        | 9 (18.4)  | 1 (2.0)  | 1 (14.3) | 0        | 17 (19.1) | 1 (1.1) |
| Chorioretinopathy                    | 2 (18.2) | 0       | 2 (40.0) | 0        | 0        | 0        | 1 (16.7) | 0        | 1 (16.7) | 0        | 7 (14.3)  | 0        | 3 (42.9) | 0        | 16 (18.0) | 0       |
| Anxiety                              | 1 (9.1)  | 0       | 1 (20.0) | 0        | 2 (40.0) | 0        | 0        | 0        | 0        | 0        | 10 (20.4) | 1 (2.0)  | 2 (28.6) | 0        | 16 (18.0) | 1 (1.1) |
| Urinary tract infection              | 1 (9.1)  | 1 (9.1) | 2 (40.0) | 0        | 2 (40.0) | 0        | 1 (16.7) | 1 (16.7) | 1 (16.7) | 1 (16.7) | 8 (16.3)  | 1 (2.0)  | 0        | 0        | 15 (16.9) | 4 (4.5) |
| Blood alkaline phosphatase increased | 0        | 0       | 1 (20.0) | 0        | 1 (20.0) | 1 (20.0) | 1 (16.7) | 1 (16.7) | 0        | 0        | 9 (18.4)  | 0        | 2 (28.6) | 1 (14.3) | 14 (15.7) | 3 (3.4) |
| Depression                           | 1 (9.1)  | 0       | 0        | 0        | 1 (20.0) | 0        | 1 (16.7) | 0        | 0        | 0        | 10 (20.4) | 0        | 0        | 0        | 13 (14.6) | 0       |
| Hypoalbuminemia                      | 1 (9.1)  | 0       | 2 (40.0) | 0        | 0        | 0        | 0        | 0        | 0        | 0        | 8 (16.3)  | 2 (4.1)  | 1 (14.3) | 0        | 12 (13.5) | 2 (2.2) |
| Hypophosphatemia                     | 0        | 0       | 1 (20.0) | 0        | 0        | 0        | 1 (16.7) | 1 (16.7) | 1 (16.7) | 1 (16.7) | 9 (18.4)  | 5 (10.2) | 0        | 0        | 12 (13.5) | 7 (7.9) |
| Dehydration                          | 0        | 0       | 1 (20.0) | 1 (20.0) | 1 (20.0) | 0        | 2 (33.3) | 0        | 0        | 0        | 8 (16.3)  | 1 (2.0)  | 0        | 0        | 12 (13.5) | 2 (2.2) |
| Cough                                | 2 (18.2) | 0       | 0        | 0        | 0        | 0        | 0        | 0        | 1 (16.7) | 0        | 8 (16.3)  | 0        | 1 (14.3) | 0        | 12 (13.5) | 0       |
| Abdominal pain                       | 2 (18.2) | 1 (9.1) | 0        | 0        | 1 (20.0) | 1 (20.0) | 1 (16.7) | 0        | 0        | 0        | 5 (10.2)  | 1 (2.0)  | 2 (28.6) | 0        | 11 (12.4) | 3 (3.4) |
| Blood creatinine increased           | 2 (18.2) | 0       | 0        | 0        | 0        | 0        | 1 (16.7) | 0        | 1 (16.7) | 0        | 6 (12.2)  | 0        | 0        | 0        | 10 (11.2) | 0       |
| Hypomagnesemia                       | 0        | 0       | 0        | 0        | 0        | 0        | 0        | 0        | 1 (16.7) | 0        | 8 (16.3)  | 0        | 1 (14.3) | 0        | 10 (11.2) | 0       |
| Dry skin                             | 0        | 0       | 2 (40.0) | 1 (20.0) | 1 (20.0) | 0        | 1 (16.7) | 0        | 1 (16.7) | 0        | 3 (6.1)   | 0        | 2 (28.6) | 0        | 10 (11.2) | 1 (1.1) |
| Thrombocytopenia                     | 1 (9.1)  | 0       | 1 (20.0) | 0        | 1 (20.0) | 0        | 3 (50.0) | 0        | 1 (16.7) | 0        | 2 (4.1)   | 0        | 1 (14.3) | 0        | 10 (11.2) | 0       |
| Hypocalcemia                         | 0        | 0       | 0        | 0        | 0        | 0        | 1 (16.7) | 0        | 0        | 0        | 7 (14.3)  | 3 (6.1)  | 1 (14.3) | 0        | 9 (10.1)  | 3 (3.4) |
| Dizziness                            | 0        | 0       | 1 (20.0) | 0        | 1 (20.0) | 0        | 1 (16.7) | 0        | 0        | 0        | 6 (12.2)  | 0        | 0        | 0        | 9 (10.1)  | 0       |

Abbreviations: ALT, alanine aminotransferase; AST, aspartate aminotransferase; bid, twice daily; CPK, creatine phosphokinase; G, grade; pt, patient; qd, once daily.

**Table S4.** Summary of best overall response per RECIST as per investigator assessment by patient group, patients at recommended phase II dose (RP2D; buparlisib 80 mg plus binimetinib 45 mg)

| Parameter                                                  | Adv <i>EGFR</i> <sup>mut</sup> | <i>RAS/BRAF</i> <sup>mut</sup> | <i>KRAS</i> <sup>mut</sup> |
|------------------------------------------------------------|--------------------------------|--------------------------------|----------------------------|
|                                                            | NSCLC                          | Ovarian Cancer                 | NSCLC                      |
|                                                            | <i>N</i> = 13                  | <i>N</i> = 18                  | <i>N</i> = 11              |
|                                                            | <i>n</i> (%)                   | <i>n</i> (%)                   | <i>n</i> (%)               |
| Complete response (CR)                                     | 0                              | 0                              | 0                          |
| Partial response (PR)                                      | 1 (7.7)                        | 5 (27.8) <sup>a</sup>          | 0                          |
| Stable disease (SD)                                        | 4 (30.8)                       | 6 (33.3)                       | 6 (54.5)                   |
| Progressive disease (PD)                                   | 3 (23.1)                       | 6 (33.3)                       | 1 (9.1)                    |
| Unknown                                                    | 5 (38.5)                       | 1 (5.6)                        | 4 (36.4)                   |
| <b>Overall response rate (CR or PR), <i>n</i> (%)</b>      | 1 (7.7)                        | 5 (27.8)                       | 0                          |
| 95% CI                                                     | 0.2-36.0                       | 9.7-53.5                       | 0.0-28.5                   |
| <b>Disease control rate (CR or PR or SD), <i>n</i> (%)</b> | 5 (38.5)                       | 11 (61.1)                      | 6 (54.5)                   |
| 95% CI                                                     | 13.9-68.4                      | 35.7-82.7                      | 23.4-33.3                  |

Abbreviations: Adv, advanced; CI, confidence interval; EGFR, epidermal growth factor receptor; mut, mutant; NSCLC, non-small cell lung cancer.

<sup>a</sup> *KRAS* mutation, *n* = 2; *NRAS* mutation, *n* = 1; *BRAF* mutation, *n* = 2

**Table S5.** Summary of selected pharmacokinetic parameters by treatment group (RP2D) at Day 15

| Binimetinib 45 mg + Buparlisib 80 mg |                               |                          |                      |                  |                 |
|--------------------------------------|-------------------------------|--------------------------|----------------------|------------------|-----------------|
|                                      | $AUC_{(0-last)}$<br>(h•ng/mL) | $AUC_{tau}$<br>(h•ng/mL) | $C_{max}$<br>(ng/mL) | $T_{max}$<br>(h) | $R_{acc}$       |
| <b>Binimetinib (N = 47)</b>          | <b>(n = 21)</b>               | <b>(n = 12)</b>          | <b>(n = 21)</b>      | <b>(n = 21)</b>  | <b>(n = 12)</b> |
| Geo-mean                             | 2,116.96                      | 2,668.02                 | 533.7                |                  | 1.46            |
| CV% geo-mean                         | 46.19                         | 46.71                    | 54.6                 |                  | 31.46           |
| Median                               | 1,879.85                      | 2,275.63                 | 536.0                | 1.52             | 1.47            |
| [min, max]                           | [832.41–4,477.25]             | [1,542.99–5,230.23]      | [132.0–1,180.0]      | [0.45–5.00]      | [0.87–2.42]     |
| <b>Buparlisib (N=47)</b>             | <b>(n = 22)</b>               | <b>(n = 15)</b>          | <b>(n = 22)</b>      | <b>(n = 22)</b>  | <b>(n = 14)</b> |
| Geo-mean                             | 9,357.78                      | 11,690.71                | 764.3                |                  | 2.64            |
| CV% geo-mean                         | 53.15                         | 36.44                    | 36.6                 |                  | 38.23           |
| Median                               | 9,827.50                      | 11586.13                 | 731.5                | 2.94             | 2.64            |
| [min, max]                           | [2,780.25–19,924.95]          | [7321.74–23,531.58]      | [461.0–1,310.0]      | [0.50–7.13]      | [1.27–4.66]     |

Abbreviations: AUC, area under the concentration curve;  $C_{max}$ , maximum plasma concentration; CV, coefficient of variation;  $R_{acc}$ , relative accumulation ratio<sup>a</sup>;  $T_{max}$ , time to maximum plasma concentration.

<sup>a</sup> Calculated as  $AUC_{\tau,ss}/AUC_{\tau}$  dose1.
